# Supplementary material for: Genomic heterogeneity in pancreatic cancer organoids and its stability with culture
Source: Springer Nature journal article supplement (doi:10.1038/s41525-022-00342-9), 2022-12-19
Supplement: MOESM1 [file 41525_2022_342_MOESM1_ESM.pdf]

**a**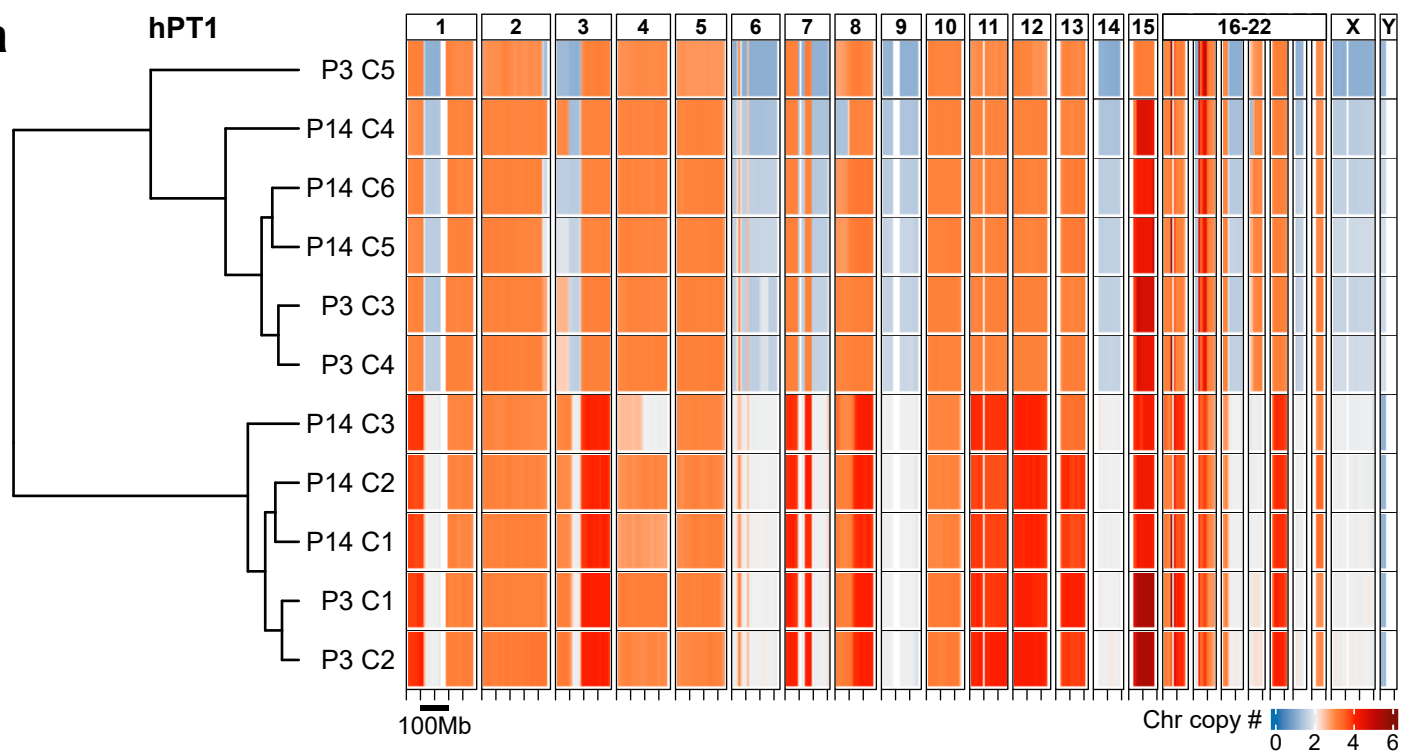**b**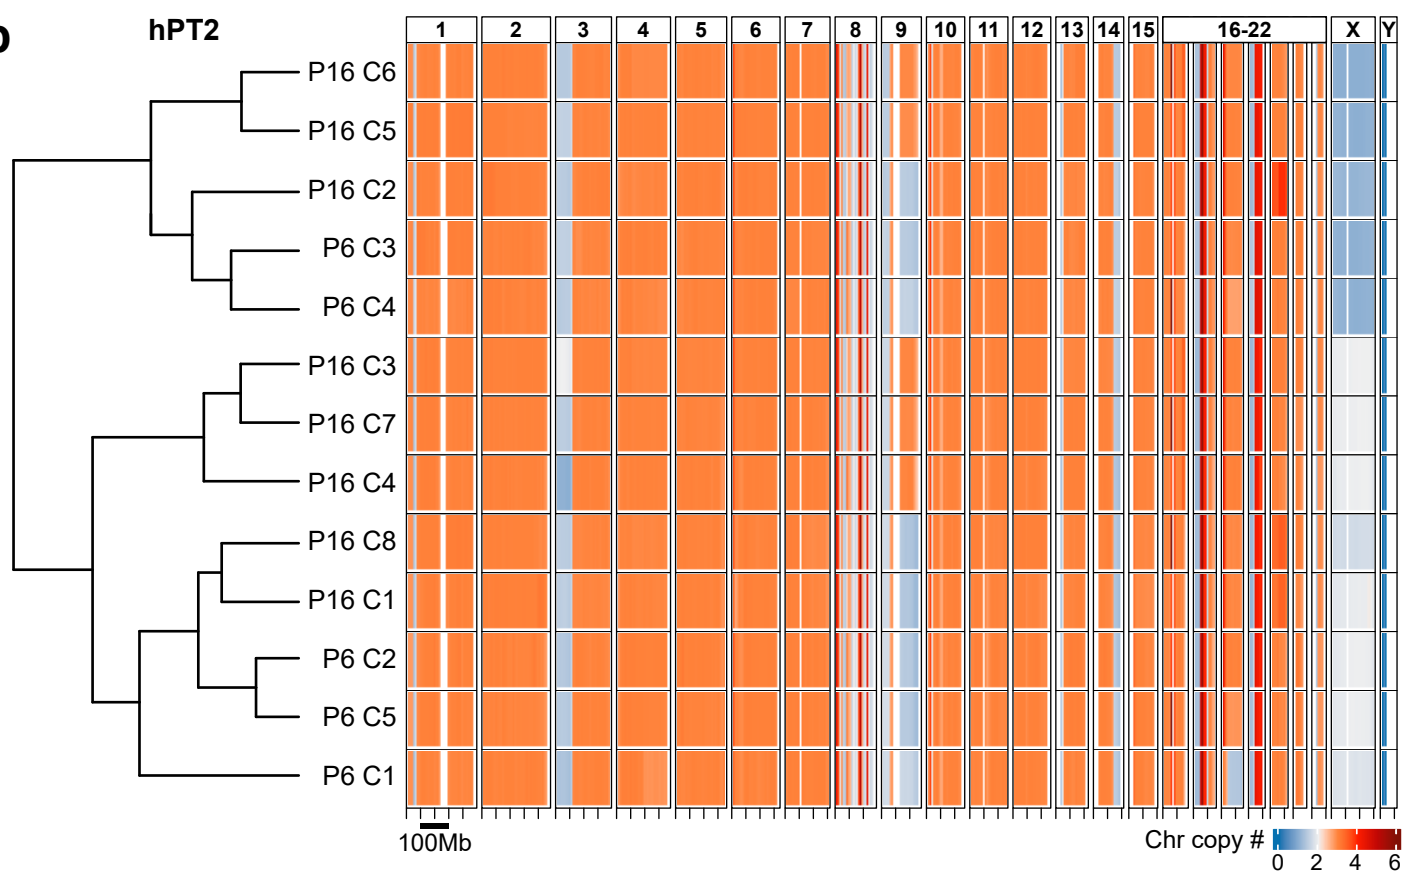

**Supplementary Figure 1. Hierarchical clustering confirms the correlations between the sub-population clusters suggested by the phylogenetic tree analysis.** The single-cell chromosome copy number data of the clusters identified in Figure 2 were averaged and their correlation was elucidated through hierarchical clustering. The distance between each cluster was calculated using the Canberra distance method. **(a)** Similar to the hPT1 phylogenetic tree in Figure 3A, the hPT1 dendrogram also reveals two distinct groups of clusters, where P3 C1-2 are closest to P14 C1-3 and P3 C3-5 are closest to P14 C4-6. **(b)** The hPT2 dendrogram shows three groups of clusters: the first one consists of P6 C1-2, C5, and P16 C1, C8, the second one consists of P16 C3-4, C7, and the third one consists of P6 C3-4, and P16 C2, C5-6. Again, this generally resembles the phylogenetic tree of hPT2 in Figure 3B.

**a**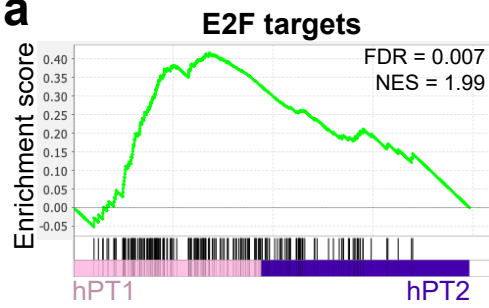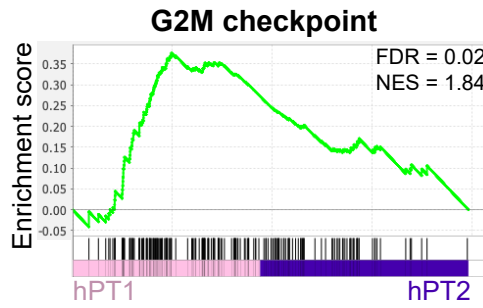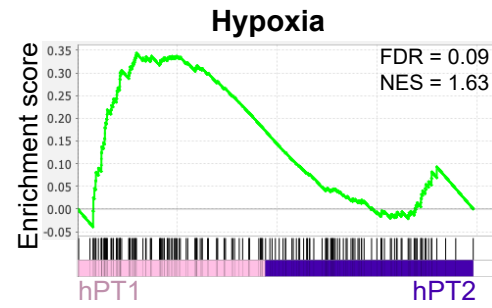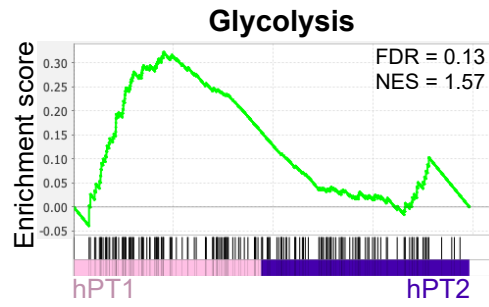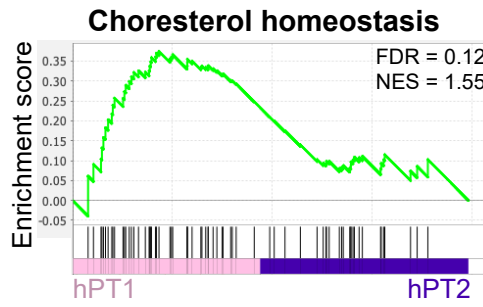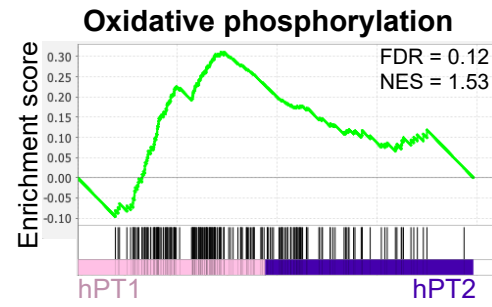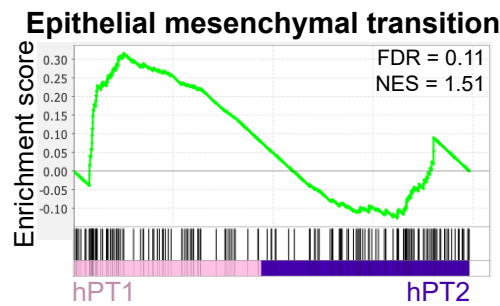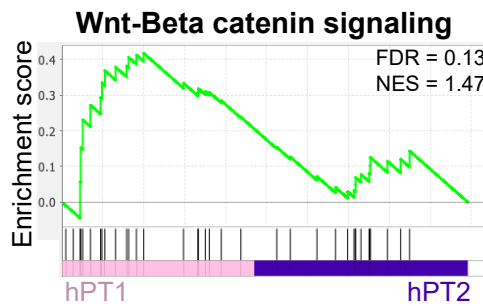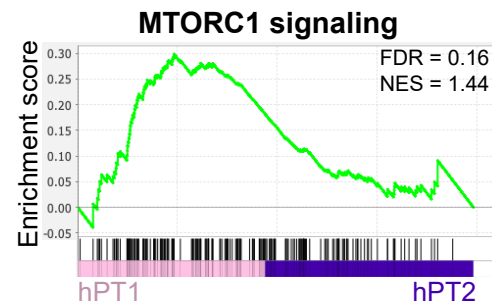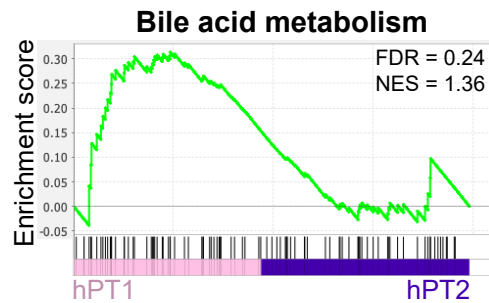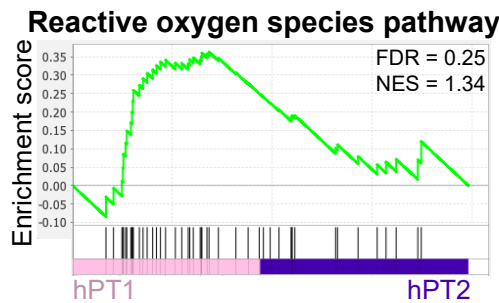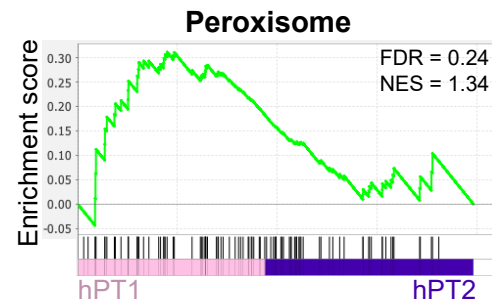**b**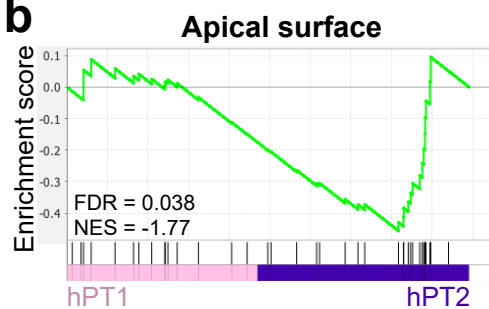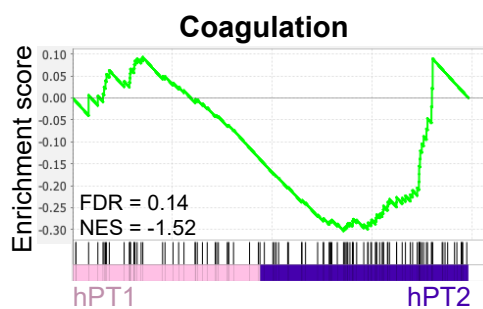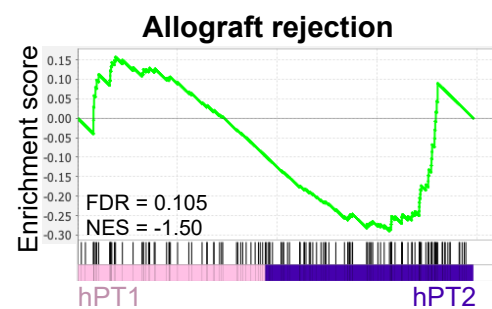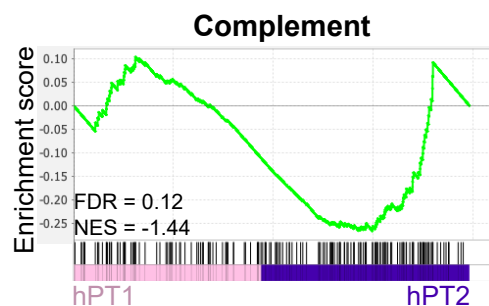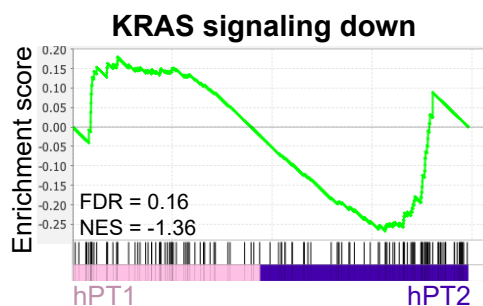

## **Supplementary Figure 2. Gene set enrichment analysis (GSEA) of the hPT1 and hPT2**

**RNA-seq data.** GSEA was performed on the hPT1 and hPT2 RNA-seq data using the “hallmark” gene sets of the human molecular signatures database (MSigDB). A positive enrichment score suggests an enrichment of a gene set driven by the genes upregulated in hPT1, while a negative enrichment score suggests an enrichment of a gene set driven by the genes upregulated in hPT2. False discovery rate (FDR) < 25% was used as the threshold to select significant enrichment. **(a)** GSEA identifies 12 gene sets that are significantly enriched in hPT1, and **(b)** 5 gene sets that are significantly enriched in hPT2.
